# Supplementary material for: Association between Common Variation at the FTO Locus and Changes in Body Mass Index from Infancy to Late Childhood: The Complex Nature of Genetic Association through Growth and Development
Source: PLOS journal article supplement (doi:10.1371/journal.pgen.1001307), 2011-02-17
Supplement: S1 (10.1371/journal.pgen.1001307.s001) [file journal.pgen.1001307.s001]

**Table S1:** Allele frequencies at rs9939609 for contributing studies.

| Study | Minor allele frequency (SE) | PHWE |
| --- | --- | --- |
| ALSPAC | 0.396 (0.004) | 0.7 |
| BCG | 0.388 (0.015) | 0.8 |
| CH | 0.419 (0.012) | 0.8 |
| EBS | 0.388 (0.007) | 0.4 |
| NFBC1966 | 0.393 (0.006) | 0.8 |
| GENR | 0.381 (0.007) | 0.6 |
| RAINE | 0.391 (0.010) | 0.5 |
| UBC | 0.430 (0.014) | 0.3 |
